# Supplementary material for: The dermacozines and light: a novel phenazine semiquinone radical based photocatalytic system from the deepest oceanic trench of the Earth
Source: Royal Society of Chemistry journal article supplement (doi:10.1039/d4ob00816b), 2024-01-01
Supplement: d4ob00816b1.pdf [file d4ob00816b1.pdf]

## Supporting Information

### The Dermacozines and Light: A Novel Phenazine Semiquinone Radical based Photocatalytic System from the Deepest Oceanic Trench of the Earth

Bertalan Juhasz<sup>1</sup>, Angel Cuesta<sup>2,3</sup>, Russel F. Howe<sup>2</sup>, \*Marcel Jaspars<sup>1</sup>

<sup>1</sup> Marine Biodiscovery Centre, Department of Chemistry, University of Aberdeen, Aberdeen AB24 3UE, Scotland, UK

<sup>2</sup> Department of Chemistry, University of Aberdeen, Aberdeen AB24 3UE, Scotland, UK

<sup>3</sup> Centre for Energy Transition, University of Aberdeen, Aberdeen AB24 3FX, Scotland, UK

\* Corresponding author: [m.jaspars@abdn.ac.uk](mailto:m.jaspars@abdn.ac.uk); [angel.cuestaciscar@abdn.ac.uk](mailto:angel.cuestaciscar@abdn.ac.uk).

#### Table of Contents

|                                                                                                                                                                                                                                                                                                                                        |    |
|----------------------------------------------------------------------------------------------------------------------------------------------------------------------------------------------------------------------------------------------------------------------------------------------------------------------------------------|----|
| S1. Dermacozines isolated to date. [Ref.2,3,4,5] .....                                                                                                                                                                                                                                                                                 | 3  |
| S2. Dermacozines, isolation (stationary phase: silica, mobile phase: 90% CH <sub>2</sub> Cl <sub>2</sub> -10% CH <sub>3</sub> OH) .....                                                                                                                                                                                                | 4  |
| S3. UV-Vis measured Longest AMs of dermacozines (solvent: C <sub>2</sub> H <sub>5</sub> OH) in the visible EM radiation in [nm] [Ref.2,3,4,5], [m], [Hz], [J] and [eV]. .....                                                                                                                                                          | 5  |
| S4. Longest AMs of dermacozines in the visible EM (solvent: C <sub>2</sub> H <sub>5</sub> OH) <sup>[2,3,4,5]</sup> [eV]. .....                                                                                                                                                                                                         | 5  |
| S5. Dermacozine B Cyclic Voltammetry measurements (0.1 M NaClO <sub>4</sub> in CH <sub>3</sub> CN). .....                                                                                                                                                                                                                              | 6  |
| S6. Dermacozine E Cyclic Voltammetry measurements (0.1 M NaClO <sub>4</sub> in CH <sub>3</sub> CN). .....                                                                                                                                                                                                                              | 6  |
| S7. Dermacozine F Cyclic Voltammetry measurements (0.1 M NaClO <sub>4</sub> in CH <sub>3</sub> CN). .....                                                                                                                                                                                                                              | 7  |
| S8. Dermacozine O Cyclic Voltammetry measurements (0.1 M NaClO <sub>4</sub> in CH <sub>3</sub> CN). .....                                                                                                                                                                                                                              | 7  |
| S9. PCA Cyclic Voltammetry measurements (0.1 M NaClO <sub>4</sub> in CH <sub>3</sub> CN). .....                                                                                                                                                                                                                                        | 8  |
| S10. Dermacozine P Cyclic Voltammetry measurements (0.1 M NaClO <sub>4</sub> in CH <sub>3</sub> CN). .....                                                                                                                                                                                                                             | 8  |
| S11. Measured anodic and cathodic potentials of dermacozines in 0.1 M NaClO <sub>4</sub> in CH <sub>3</sub> CN ± Standard Errors (SE), and calculated anodic and cathodic values ± Mean Errors (ME) based on 13.a. linear regression (calculated anodic potentials) and arithmetic mean of measured cathodic potentials (μ) ± ME. .... | 9  |
| S12.a. Dermacozine B, E, F, O and PCA's experimental optical (Solvent: C <sub>2</sub> H <sub>5</sub> OH) and experimental electric HOMO-LUMO energy gaps (solvent: CH <sub>3</sub> CN) correlation. ....                                                                                                                               | 10 |
| S12.b. Dermacozine B, E, F, O and PCA's experimental optical [eV] (Solvent: C <sub>2</sub> H <sub>5</sub> OH) and experimental electric HOMO-LUMO energy gaps [V] (solvent: CH <sub>3</sub> CN) multiple regression. ....                                                                                                              | 10 |
| S13.a. Linear correlation between the experimental anodic potentials of dermacozine B, E, F, O and PCA [V] with Cyclic Voltammetry (solvent: CH <sub>3</sub> CN) and the experimental optical HOMO-LUMO gaps measured with UV-Vis Spectroscopy (solvent C <sub>2</sub> H <sub>5</sub> OH) [eV]. ....                                   | 11 |
| S13.b. Multiple Regression between the experimental anodic potentials of dermacozine B, E, F, O and PCA [V] measured with Cyclic Voltammetry (solvent: CH <sub>3</sub> CN) and the experimental optical HOMO-LUMO gaps measured with UV-Vis Spectroscopy (solvent C <sub>2</sub> H <sub>5</sub> OH) [eV]. ....                         | 11 |
| S14.a. Linear correlation between the cathodic potentials of dermacozine B, E, F, O and PCA [V] measured with Cyclic Voltammetry (solvent: CH <sub>3</sub> CN) and the experimental optical HOMO-LUMO gaps measured with UV-Vis Spectroscopy (solvent C <sub>2</sub> H <sub>5</sub> OH) [eV]. ....                                     | 12 |

|                                                                                                                                                                                                                                                                                                                    |     |
|--------------------------------------------------------------------------------------------------------------------------------------------------------------------------------------------------------------------------------------------------------------------------------------------------------------------|-----|
| S14.b. Multiple regression between the experimental cathodic potentials of dermacozine B, E, F, O and PCA [V] measured with Cyclic Voltammetry (solvent: CH <sub>3</sub> CN) and the experimental optical HOMO-LUMO gaps measured with UV-Vis Spectroscopy (solvent C <sub>2</sub> H <sub>5</sub> OH) [eV].        | 12  |
| S15. Dermacozine O semiquinone radical's reaction with water, EPR Spectroscopy, He atmosphere, 298 K, 550±50 nm filter in CHCl <sub>3</sub> .                                                                                                                                                                      | 13  |
| S16. Dermacozine E neutral semiquinone radical EPR (a) in chloroform (red line, experimental 550±50 nm filter, blue dashed line modelled EPR spectrum) and (b) UV Vis Spectrum before and after the the dermacozine E semiquinone radical formed in chloroform (inlet: confirmed dermacozine E radical structure). | 14  |
| S17. Dermacozine O neutral semiquinone radical EPR (a) in chloroform (red line, experimental 550±50 nm filter, blue dashed line modelled EPR spectrum) and (b) UV Vis Spectrum before and after the the dermacozine O semiquinone radical formed in chloroform (inlet: confirmed dermacozine O radical structure). | 14  |
| S18. Dermacozine O radical UV-Vis Spectrum in CHCl <sub>3</sub> .                                                                                                                                                                                                                                                  | 14  |
| S19. Dermacozine O UV-Vis Spectrum in CHCl <sub>3</sub> .                                                                                                                                                                                                                                                          | 15  |
| S20. Dermacozine E UV-Vis Spectrum in CHCl <sub>3</sub> (solution is blue).                                                                                                                                                                                                                                        | 15  |
| S21. Dermacozine E UV-Vis Spectrum, after EPR and with 550 nm filter irradiation, in CHCl <sub>3</sub> (solution is orange), a near infrared band (arrow) appeared at ~1000 nm.                                                                                                                                    | 15  |
| S22. Dermacozine E UV-Vis Spectrum, after EPR and with 550 nm filter irradiation, in CH <sub>3</sub> OH (colour of the solution changed to blue from orange).                                                                                                                                                      | 16  |
| S23. Dermacozine E (LC)-HR-(ESI)-MS <sup>n</sup> after irradiation and EPR in CH <sub>3</sub> OH.                                                                                                                                                                                                                  | 16  |
| S24. Dermacozine E dimer (LC)-HR-(ESI)-MS <sup>n</sup> after irradiation dissociated in CH <sub>3</sub> OH and dermacozine E is detectable again.                                                                                                                                                                  | 16  |
| S25. Dermacozine O (LC)-HR-(ESI)-MS <sup>n</sup> after irradiation and EPR in CH <sub>3</sub> OH.                                                                                                                                                                                                                  | 17  |
| S26. LC MS Mass Spectrometry Chromatogram of Dermacozine B (Orbitrap)                                                                                                                                                                                                                                              | 17  |
| S27. Dermacozine B 1D <sup>1</sup> H NMR Spectrum in DMSO- <i>d</i> <sub>6</sub> 400 MHz                                                                                                                                                                                                                           | 17  |
| S28. LC MS Mass Spectrometry Chromatogram of Dermacozine E (Orbitrap)                                                                                                                                                                                                                                              | 18  |
| S29. Dermacozine E 1D <sup>1</sup> H NMR Spectrum in DMSO- <i>d</i> <sub>6</sub> 400 MHz                                                                                                                                                                                                                           | 18  |
| S30. LC MS Mass Spectrometry Chromatogram of Dermacozine F (qToF)                                                                                                                                                                                                                                                  | 19  |
| S31. Dermacozine F 1D <sup>1</sup> H NMR Spectrum in DMSO- <i>d</i> <sub>6</sub> 400 MHz                                                                                                                                                                                                                           | 19  |
| S32. LC MS Mass Spectrometry Chromatogram of PCA (qToF)                                                                                                                                                                                                                                                            | 20  |
| S33. PCA 1D <sup>1</sup> H NMR Spectrum in DMSO- <i>d</i> <sub>6</sub> 400 MHz                                                                                                                                                                                                                                     | 200 |
| S34. Dermacozine O 1D <sup>1</sup> H NMR Spectrum in DMSO- <i>d</i> <sub>6</sub> 400 MHz                                                                                                                                                                                                                           | 21  |
| S35. LC MS Mass Spectrometry Chromatogram of Dermacozine O (qToF)                                                                                                                                                                                                                                                  | 211 |
| S36. Dermacozine P 1D <sup>1</sup> H NMR Spectrum in DMSO- <i>d</i> <sub>6</sub> 400 MHz                                                                                                                                                                                                                           | 22  |
| S37. LC MS Mass Spectrometry Chromatogram of Dermacozine P (Orbitrap)                                                                                                                                                                                                                                              | 222 |

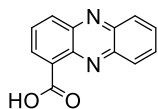

phenazine-1-carboxylic acid

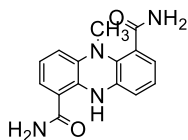

Dermacozine A

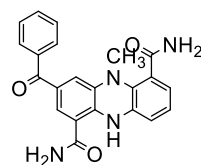

Dermacozine B

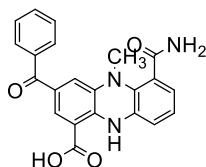

Dermacozine C

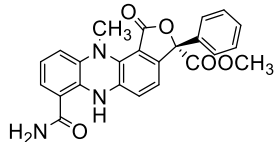

Dermacozine D

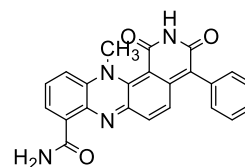

Dermacozine E

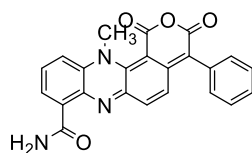

Dermacozine F

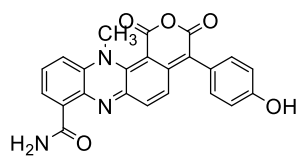

Dermacozine G

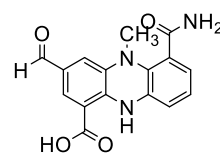

Dermacozine H

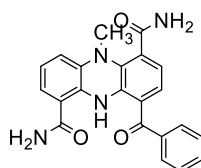

Dermacozine I

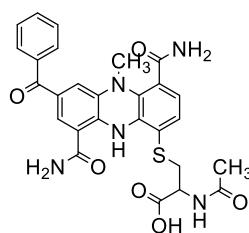

Dermacozine J

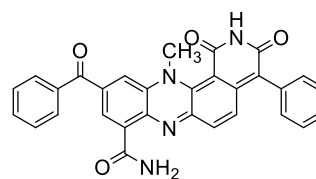

Dermacozine M

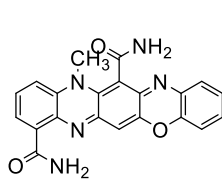

Dermacozine N

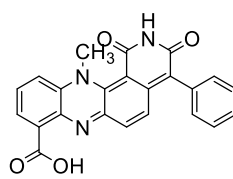

Dermacozine O

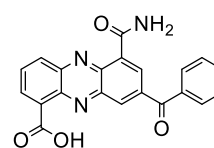

Dermacozine P

S1. Dermacozines isolated to date. [Ref.2,3,4,5]

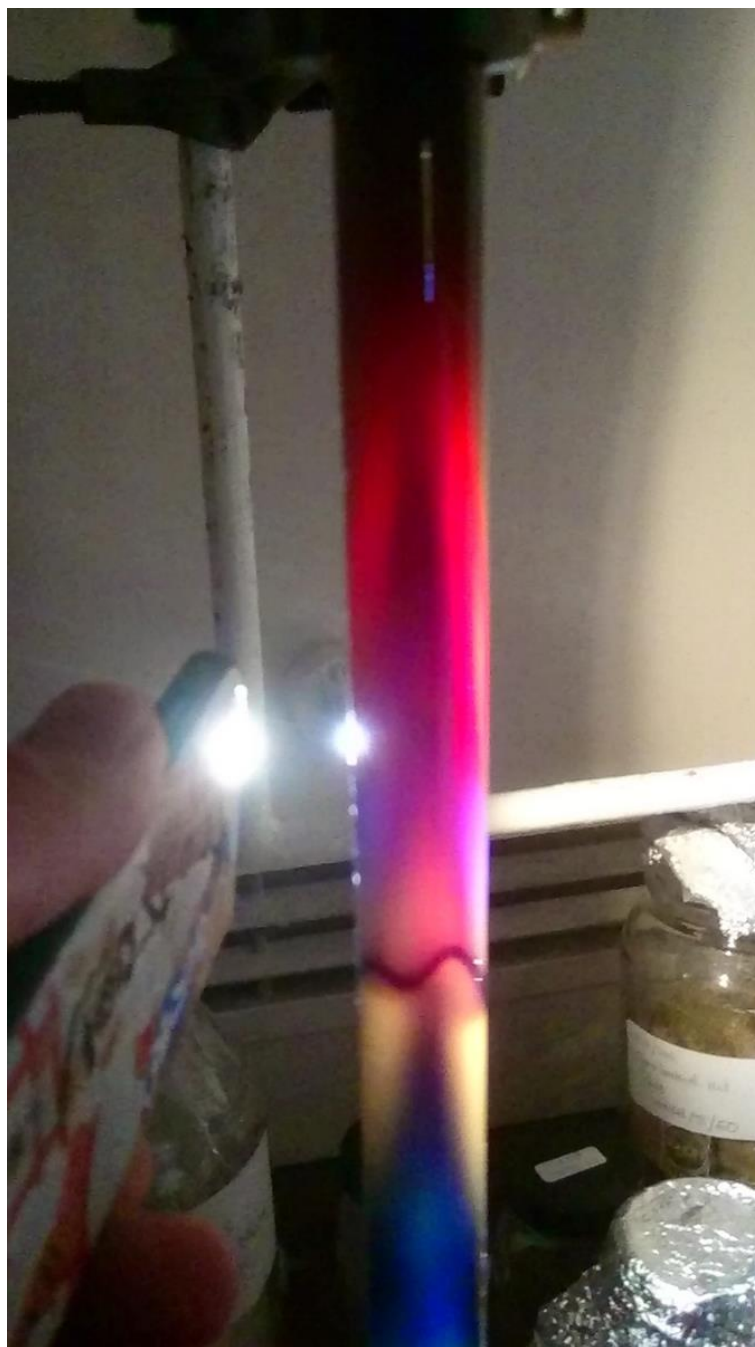

S2. Dermacozines, isolation (stationary phase: silica, mobile phase: 90%  $\text{CH}_2\text{Cl}_2$ -10%  $\text{CH}_3\text{OH}$ ).

| Dermacozine   | Longest absorption maximum in the visible [nm] | Longest absorption maximum in the visible [m] | Calculated frequency [Hz] | $E_{\text{optical\_gap\_calc\_Joules}}$ [J] | $E_{\text{optical\_gap\_calc\_eV}}$ [eV] |
|---------------|------------------------------------------------|-----------------------------------------------|---------------------------|---------------------------------------------|------------------------------------------|
| Dermacozine A | 398                                            | 3.98E-07                                      | 7.53247E+14               | 4.99107E-19                                 | 3.12                                     |
| Dermacozine B | 419                                            | 4.19E-07                                      | 7.15495E+14               | 4.74092E-19                                 | 2.96                                     |
| Dermacozine C | 460                                            | 4.60E-07                                      | 6.51723E+14               | 4.31836E-19                                 | 2.70                                     |
| Dermacozine D | 408                                            | 4.08E-07                                      | 7.34785E+14               | 4.86874E-19                                 | 3.04                                     |
| Dermacozine E | 576                                            | 5.76E-07                                      | 5.20473E+14               | 3.44869E-19                                 | 2.15                                     |
| Dermacozine F | 566                                            | 5.66E-07                                      | 5.29669E+14               | 3.50962E-19                                 | 2.19                                     |
| Dermacozine G | 580                                            | 5.80E-07                                      | 5.16884E+14               | 3.42491E-19                                 | 2.14                                     |
| Dermacozine H | 459                                            | 4.59E-07                                      | 6.53143E+14               | 4.32777E-19                                 | 2.70                                     |
| Dermacozine I | 516                                            | 5.16E-07                                      | 5.80993E+14               | 3.84970E-19                                 | 2.40                                     |
| Dermacozine J | 435                                            | 4.35E-07                                      | 6.89178E+14               | 4.56654E-19                                 | 2.85                                     |
| Dermacozine M | 590                                            | 5.90E-07                                      | 5.08123E+14               | 3.36686E-19                                 | 2.10                                     |
| Dermacozine N | 729                                            | 7.29E-07                                      | 4.11238E+14               | 2.72489E-19                                 | 1.70                                     |
| Dermacozine O | 644                                            | 6.44E-07                                      | 4.65516E+14               | 3.08454E-19                                 | 1.93                                     |
| Dermacozine P | 465                                            | 4.65E-07                                      | 6.44715E+14               | 4.27193E-19                                 | 2.67                                     |
| PCA           | 364                                            | 3.64E-07                                      | 8.23606E+14               | 5.45727E-19                                 | 3.41                                     |

S3. UV-Vis measured Longest AMs of dermacozines (solvent: C<sub>2</sub>H<sub>5</sub>OH) in the visible EM radiation in [nm] <sup>[Ref.2,3,4,5]</sup>, [m], [Hz], [J] and [eV].

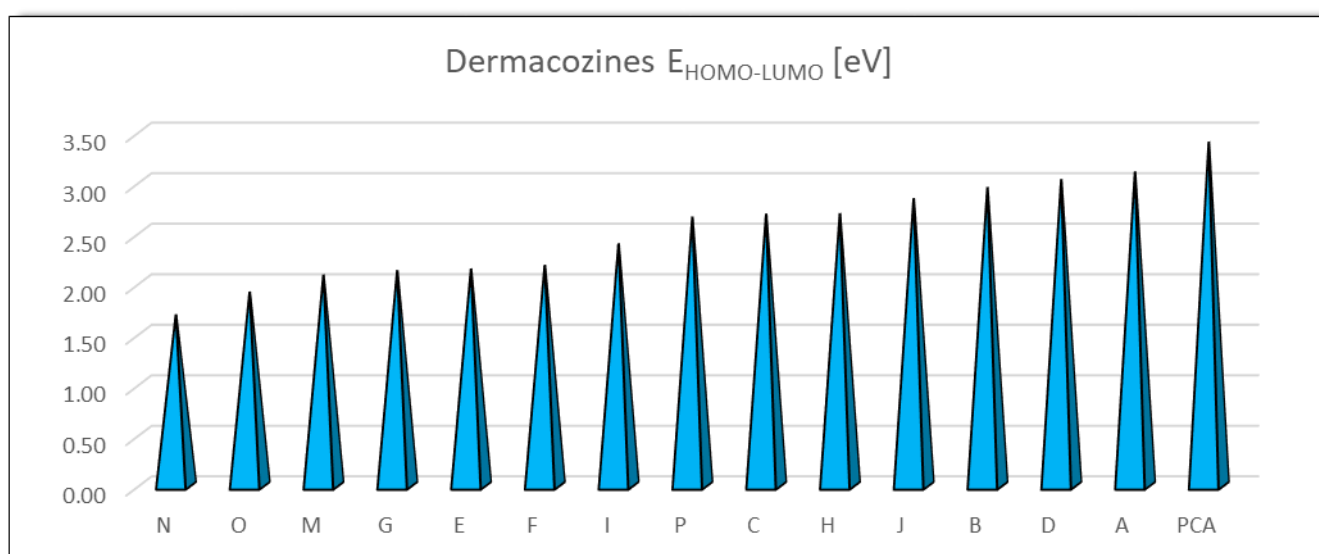

S4. Longest AMs of dermacozines in the visible EM (solvent: C<sub>2</sub>H<sub>5</sub>OH))<sup>[2,3,4,5]</sup> [eV].

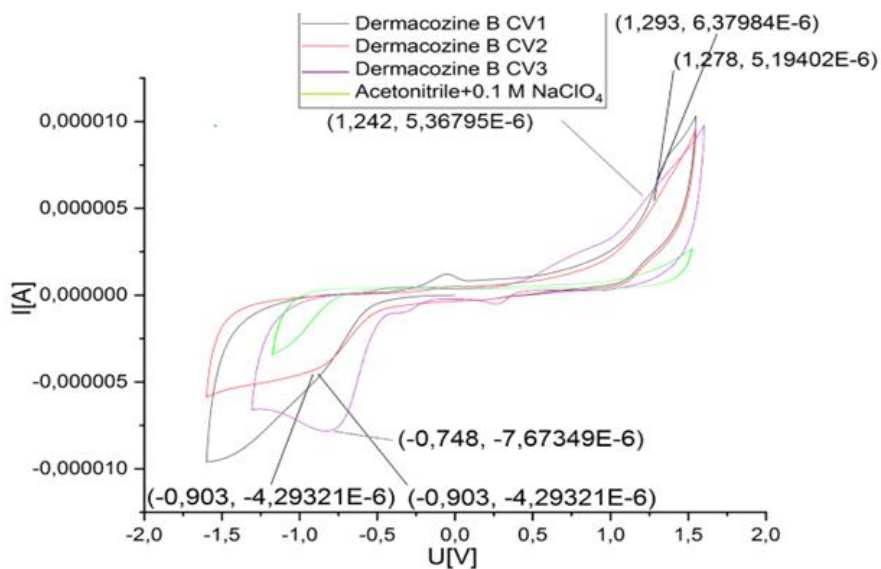

S5. Dermacozine B Cyclic Voltammetry measurements (0.1 M NaClO<sub>4</sub> in CH<sub>3</sub>CN).

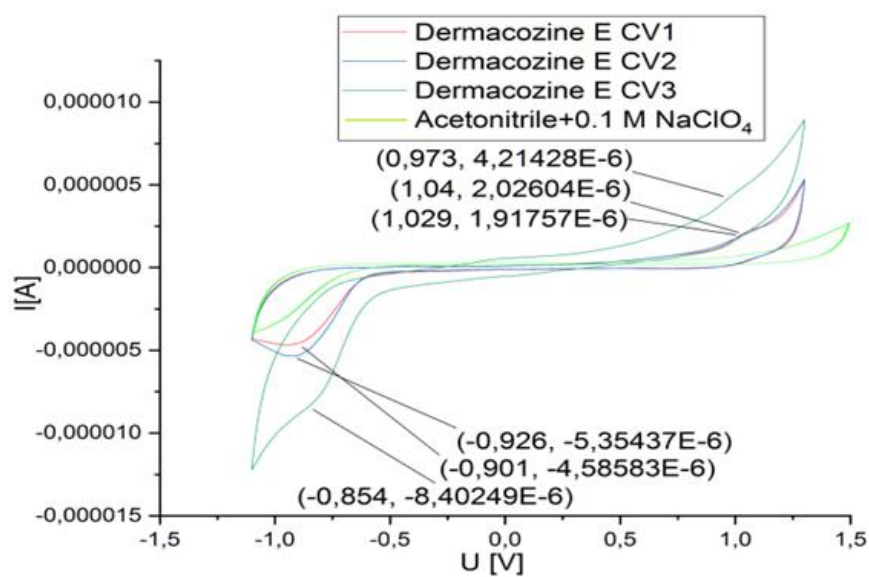

S6. Dermacozine E Cyclic Voltammetry measurements (0.1 M NaClO<sub>4</sub> in CH<sub>3</sub>CN).

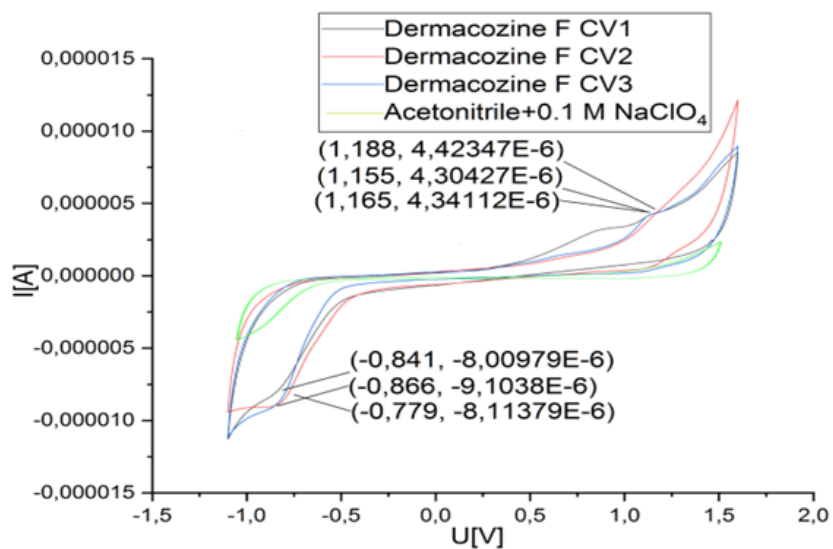

S7. Dermacozine F Cyclic Voltammetry measurements (0.1 M NaClO<sub>4</sub> in CH<sub>3</sub>CN).

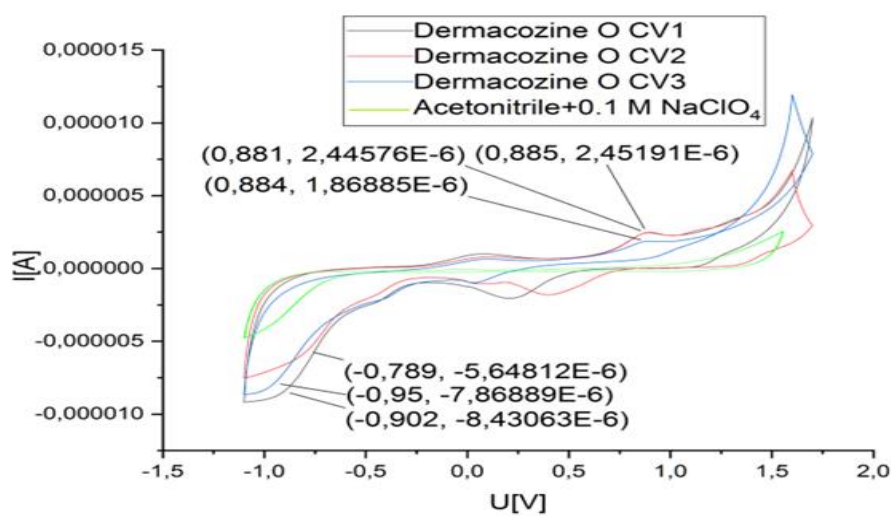

S8. Dermacozine O Cyclic Voltammetry measurements (0.1 M NaClO<sub>4</sub> in CH<sub>3</sub>CN).

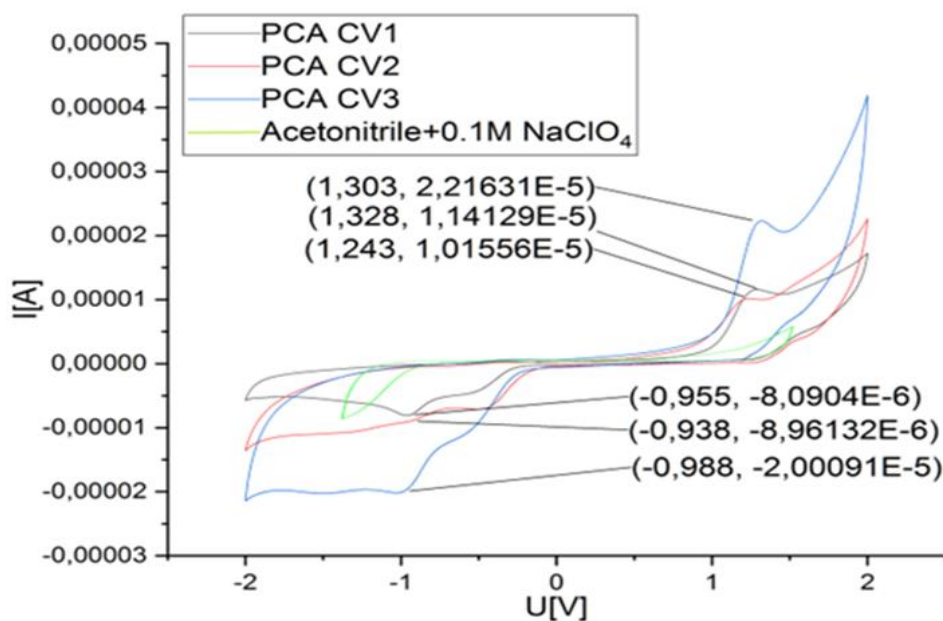

S9. PCA Cyclic Voltammetry measurements (0.1 M NaClO<sub>4</sub> in CH<sub>3</sub>CN).

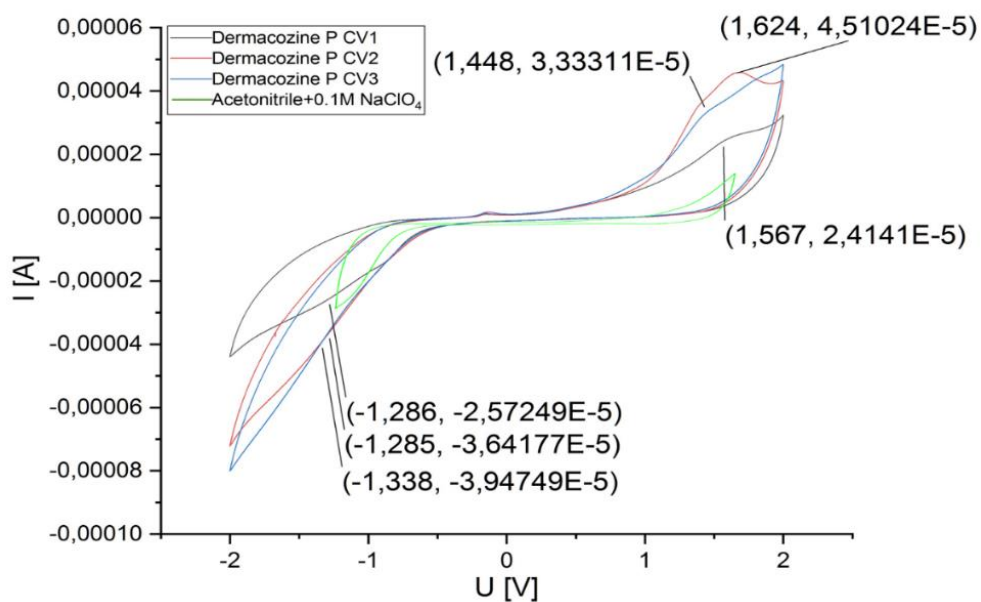

S10. Dermacozine P Cyclic Voltammetry measurements (0.1 M NaClO<sub>4</sub> in CH<sub>3</sub>CN).



| DERMACOZINE | OPTICAL GAP   | ELECTRIC GAP±SE [V]<br>(EXP) | EXPERIMENTAL ANODIC POTENTIAL±SE [V] | EXPERIMENTAL CATHODIC POTENTIAL±SE [V] | SHE REFERENCED ANODIC POTENTIALS | SHE REFERENCED CATHODIC POTENTIALS | ESTIMATED ANODIC POTENTIALS BASED ON OPTICAL GAP – ELECTRIC HOMO EXPERIMENTAL RELATIONSHIP (R <sup>2</sup> =0.73)±ME [V]<br><br>$\mu_{Anodic} [V] = \frac{E_{Optical} [eV] + 0.7}{3} \pm ME$ | ESTIMATED CATHODIC POTENTIALS FROM $\mu$ OF THE EXPERIMENTAL CATHODIC POTENTIALS [V]±ME |
|-------------|---------------|------------------------------|--------------------------------------|----------------------------------------|----------------------------------|------------------------------------|----------------------------------------------------------------------------------------------------------------------------------------------------------------------------------------------|-----------------------------------------------------------------------------------------|
|             | [eV]<br>(EXP) |                              | (AG ACETONITRILE)<br>(EXP)           | (AG ACETONITRILE)<br>(EXP)             | [V]<br>(EXP)                     | [V]<br>(EXP)                       |                                                                                                                                                                                              |                                                                                         |
| <b>N</b>    | 1,7           |                              |                                      |                                        |                                  |                                    | +0.8±0.01                                                                                                                                                                                    | -0.9±0.02                                                                               |
| <b>O</b>    | 1,9           | 1.763±0.005                  | +0.883±0.001                         | -0.880±0.005                           | +0.848±0.003                     | -0.915±0.005                       | +0.9±0.01                                                                                                                                                                                    | -0.9±0.02                                                                               |
| <b>G</b>    | 2,1           |                              |                                      |                                        |                                  |                                    | +1.0±0.01                                                                                                                                                                                    | -0.9±0.02                                                                               |
| <b>M</b>    | 2,1           |                              |                                      |                                        |                                  |                                    | +1.0±0.01                                                                                                                                                                                    | -0.9±0.02                                                                               |
| <b>E</b>    | 2,2           | 1.908±0.030                  | +1.014±0.021                         | -0.894±0.021                           | +0.979±0.021                     | -0.929±0.021                       | +1.0±0.01                                                                                                                                                                                    | -0.9±0.02                                                                               |
| <b>F</b>    | 2,2           | 1.998±0.024                  | +1.169±0.010                         | -0.829±0.022                           | +1.134±0.010                     | -0.864±0.022                       | +1.0±0.01                                                                                                                                                                                    | -0.9±0.02                                                                               |
| <b>I</b>    | 2,4           |                              |                                      |                                        |                                  |                                    | +1.1±0.01                                                                                                                                                                                    | -0.9±0.02                                                                               |
| <b>C</b>    | 2,7           |                              |                                      |                                        |                                  |                                    | +1.1±0.01                                                                                                                                                                                    | -0.9±0.02                                                                               |
| <b>H</b>    | 2,7           |                              |                                      |                                        |                                  |                                    | +1.1±0.01                                                                                                                                                                                    | -0.9±0.02                                                                               |
| <b>P</b>    | 2,7           | 2.849±0.053*                 | +1.546±0.052*                        | -1.303±0.018*                          | +1.511±0.052*                    | -1.338±0.052*                      | +1.1±0.01                                                                                                                                                                                    | -0.9±0.02                                                                               |
| <b>J</b>    | 2,9           |                              |                                      |                                        |                                  |                                    | +1.2±0.01                                                                                                                                                                                    | -0.9±0.02                                                                               |
| <b>B</b>    | 3,0           | 2.122±0.054                  | +1.271±0.015                         | -0.851±0.052                           | +1.236±0.015                     | -0.886±0.052                       | +1.2±0.01                                                                                                                                                                                    | -0.9±0.02                                                                               |
| <b>D</b>    | 3,0           |                              |                                      |                                        |                                  |                                    | +1.2±0.01                                                                                                                                                                                    | -0.9±0.02                                                                               |
| <b>A</b>    | 3,1           |                              |                                      |                                        |                                  |                                    | +1.3±0.01                                                                                                                                                                                    | -0.9±0.02                                                                               |
| <b>PCA</b>  | 3,4           | 2.252±0.029                  | +1.291±0.025                         | -0.960±0.015                           | +1.256±0.025                     | -0.995±0.015                       | +1.4±0.01                                                                                                                                                                                    | -0.9±0.02                                                                               |

S11. Measured anodic and cathodic potentials of dermacozines in 0.1 M NaClO<sub>4</sub> in CH<sub>3</sub>CN±Standard Errors (SE) and calculated anodic and cathodic values±Mean Errors (ME) based on 13.a. linear regression (calculated anodic potentials) and arithmetic mean of measured cathodic potentials ( $\mu$ )±ME. \*Dermacozine P excluded from calculations as the cathodic and anodic current overlaps too much with the solvent decomposition.

NB: Since the errors of the AMs in Ethanol are not known, no standard propagation of error but mean error (ME) was given for calculated values. Whereas the measured potentials expressed as ± standard error (SE).

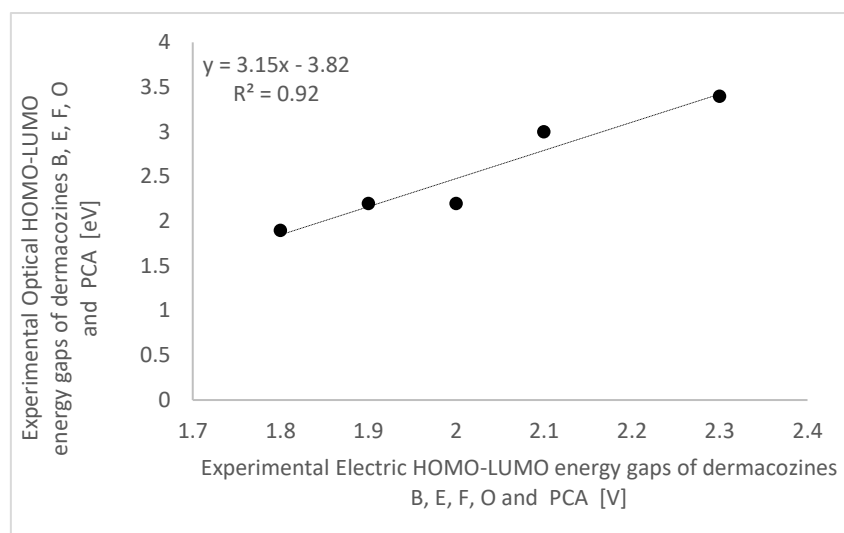

| Dermacozine | (x) $\Delta E$ electric [V] | (y) $\Delta E$ Optical [eV] |
|-------------|-----------------------------|-----------------------------|
| PCA         | 2,3                         | 3,4                         |
| B           | 2,1                         | 3                           |
| E           | 1,9                         | 2,2                         |
| F           | 2                           | 2,2                         |
| O           | 1,8                         | 1,9                         |

S12.a. Dermacozine B, E, F, O and PCA's experimental optical (Solvent: C<sub>2</sub>H<sub>5</sub>OH) and experimental electric HOMO-LUMO energy gaps (solvent: CH<sub>3</sub>CN) correlation.

| SUMMARY OUTPUT               |                       |               |                |                  |                       |                    |                    |             |
|------------------------------|-----------------------|---------------|----------------|------------------|-----------------------|--------------------|--------------------|-------------|
| <i>Regression Statistics</i> |                       |               |                |                  |                       |                    |                    |             |
| Multiple R                   | 0,960027177           |               |                |                  |                       |                    |                    |             |
| R Square                     | 0,92165218            |               |                |                  |                       |                    |                    |             |
| Adjusted R Square            | 0,89553624            |               |                |                  |                       |                    |                    |             |
| Standard Error               | 0,203903351           |               |                |                  |                       |                    |                    |             |
| Observations                 | 5                     |               |                |                  |                       |                    |                    |             |
| <i>ANOVA</i>                 |                       |               |                |                  |                       |                    |                    |             |
|                              | <i>df</i>             | <i>SS</i>     | <i>MS</i>      | <i>F</i>         | <i>Significance F</i> |                    |                    |             |
| Regression                   | 1                     | 1,46727027    | 1,46727027     | 35,2907909       | 0,009535859           |                    |                    |             |
| Residual                     | 3                     | 0,12472973    | 0,041576577    |                  |                       |                    |                    |             |
| Total                        | 4                     | 1,592         |                |                  |                       |                    |                    |             |
| <i>Coefficients</i>          |                       |               |                |                  |                       |                    |                    |             |
|                              | <i>Standard Error</i> | <i>t Stat</i> | <i>P-value</i> | <i>Lower 95%</i> | <i>Upper 95%</i>      | <i>Lower 95,0%</i> | <i>Upper 95,0%</i> |             |
| Intercept                    | -3,82027027           | 1,074519785   | -3,555327993   | 0,037946247      | -7,23987179           | -0,40066875        | -7,23987179        | -0,40066875 |
| X Variable 1                 | 3,148648649           | 0,530021523   | 5,940605264    | 0,009535859      | 1,461883611           | 4,835413686        | 1,461883611        | 4,835413686 |

S12.b. Dermacozine B, E, F, O and PCA's experimental optical [eV] (Solvent: C<sub>2</sub>H<sub>5</sub>OH) and experimental electric HOMO-LUMO energy gaps [V] (solvent: CH<sub>3</sub>CN) multiple regression (Microsoft Excel).

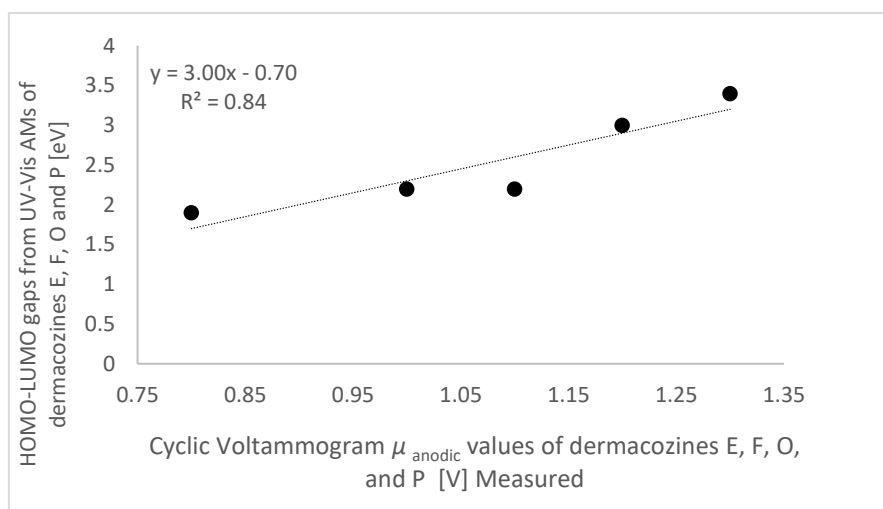

| Dermacozine | (x) Electric HOMO [V] | (y) $\Delta E$ Optical [eV] |
|-------------|-----------------------|-----------------------------|
| PCA         | 1,3                   | 3,4                         |
| B           | 1,2                   | 3                           |
| E           | 1                     | 2,2                         |
| F           | 1,1                   | 2,2                         |
| O           | 0,8                   | 1,9                         |

S13.a. Linear correlation between the experimental anodic potentials of dermacozine B, E, F, O and PCA [V] with Cyclic Voltammetry (solvent:  $\text{CH}_3\text{CN}$ ) and the experimental optical HOMO-LUMO gaps measured with UV-Vis Spectroscopy (solvent  $\text{C}_2\text{H}_5\text{OH}$ ) [eV].

| SUMMARY OUTPUT               |                     |                       |               |                |                       |                  |                    |                    |
|------------------------------|---------------------|-----------------------|---------------|----------------|-----------------------|------------------|--------------------|--------------------|
| <i>Regression Statistics</i> |                     |                       |               |                |                       |                  |                    |                    |
| Multiple R                   | 0,914704005         |                       |               |                |                       |                  |                    |                    |
| R Square                     | 0,836683417         |                       |               |                |                       |                  |                    |                    |
| Adjusted R Square            | 0,782244556         |                       |               |                |                       |                  |                    |                    |
| Standard Error               | 0,294392029         |                       |               |                |                       |                  |                    |                    |
| Observations                 | 5                   |                       |               |                |                       |                  |                    |                    |
| <i>ANOVA</i>                 |                     |                       |               |                |                       |                  |                    |                    |
|                              | <i>df</i>           | <i>SS</i>             | <i>MS</i>     | <i>F</i>       | <i>Significance F</i> |                  |                    |                    |
| Regression                   | 1                   | 1,332                 | 1,332         | 15,36923077    | 0,029518265           |                  |                    |                    |
| Residual                     | 3                   | 0,26                  | 0,086666667   |                |                       |                  |                    |                    |
| Total                        | 4                   | 1,592                 |               |                |                       |                  |                    |                    |
| <i>Coefficients</i>          |                     |                       |               |                |                       |                  |                    |                    |
|                              | <i>Coefficients</i> | <i>Standard Error</i> | <i>t Stat</i> | <i>P-value</i> | <i>Lower 95%</i>      | <i>Upper 95%</i> | <i>Lower 95,0%</i> | <i>Upper 95,0%</i> |
| Intercept                    | -0,7                | 0,836875355           | -0,836444753  | 0,464292127    | -3,363310883          | 1,963310883      | -3,363310883       | 1,963310883        |
| X Variable 1                 | 3                   | 0,765235641           | 3,920361051   | 0,029518265    | 0,564678663           | 5,435321337      | 0,564678663        | 5,435321337        |

S13.b. Multiple Regression (Microsoft Excel) between the experimental anodic potentials of dermacozine B, E, F, O and PCA [V] measured with Cyclic Voltammetry (solvent:  $\text{CH}_3\text{CN}$ ) and the experimental optical HOMO-LUMO gaps measured with UV-Vis Spectroscopy (solvent  $\text{C}_2\text{H}_5\text{OH}$ ) [eV].

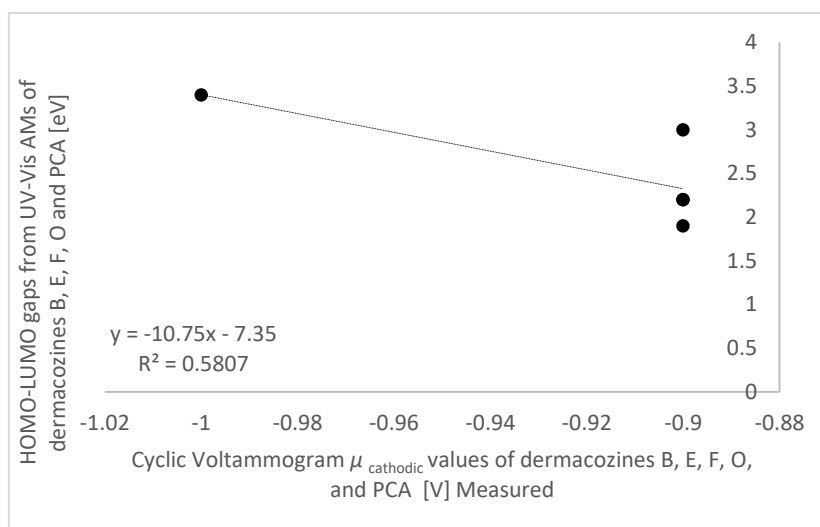

| Dermacozine | (x) Electric LUMO [V] | (y) $\Delta E$ Optical [eV] |
|-------------|-----------------------|-----------------------------|
| PCA         | -1                    | 3,4                         |
| B           | -0,9                  | 3                           |
| E           | -0,9                  | 2,2                         |
| F           | -0,9                  | 2,2                         |
| O           | -0,9                  | 1,9                         |

S14.a. Linear correlation between the cathodic potentials of dermacozine B, E, F, O and PCA [V] measured with Cyclic Voltammetry (solvent: CH<sub>3</sub>CN) and the experimental optical HOMO-LUMO gaps measured with UV-Vis Spectroscopy (solvent C<sub>2</sub>H<sub>5</sub>OH) [eV].

| SUMMARY OUTPUT               |                     |                       |               |                |                       |                  |                                       |
|------------------------------|---------------------|-----------------------|---------------|----------------|-----------------------|------------------|---------------------------------------|
| <i>Regression Statistics</i> |                     |                       |               |                |                       |                  |                                       |
| Multiple R                   | 0,762047295         |                       |               |                |                       |                  |                                       |
| R Square                     | 0,58071608          |                       |               |                |                       |                  |                                       |
| Adjusted R Square            | 0,440954774         |                       |               |                |                       |                  |                                       |
| Standard Error               | 0,471699057         |                       |               |                |                       |                  |                                       |
| Observations                 | 5                   |                       |               |                |                       |                  |                                       |
| <i>ANOVA</i>                 |                     |                       |               |                |                       |                  |                                       |
|                              | <i>df</i>           | <i>SS</i>             | <i>MS</i>     | <i>F</i>       | <i>Significance F</i> |                  |                                       |
| Regression                   | 1                   | 0,9245                | 0,9245        | 4,15505618     | 0,134253828           |                  |                                       |
| Residual                     | 3                   | 0,6675                | 0,2225        |                |                       |                  |                                       |
| Total                        | 4                   | 1,592                 |               |                |                       |                  |                                       |
|                              | <i>Coefficients</i> | <i>Standard Error</i> | <i>t Stat</i> | <i>P-value</i> | <i>Lower 95%</i>      | <i>Upper 95%</i> | <i>Lower 95,0%</i> <i>Upper 95,0%</i> |
| Intercept                    | -7,35               | 4,856439025           | -1,513454604  | 0,227379012    | -22,80535643          | 8,105356431      | -22,8053564 8,105356431               |
| X Variable 1                 | -10,75              | 5,273755777           | -2,038395492  | 0,134253828    | -27,53344459          | 6,033444589      | -27,5334446 6,033444589               |

S14.b. Multiple regression (Microsoft Excel) between the experimental cathodic potentials of dermacozine B, E, F, O and PCA [V] measured with Cyclic Voltammetry (solvent: CH<sub>3</sub>CN) and the experimental optical HOMO-LUMO gaps measured with UV-Vis Spectroscopy (solvent C<sub>2</sub>H<sub>5</sub>OH) [eV].

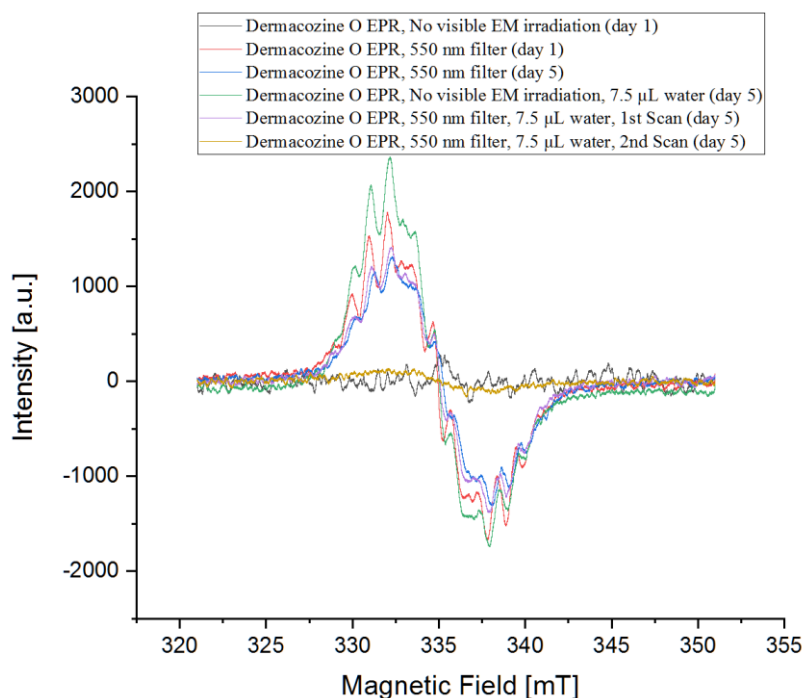

S15. Dermacozine O semiquinone radical's reaction with water, EPR Spectroscopy, He atmosphere, 298 K, 550 $\pm$ 50 nm filter in  $\text{CHCl}_3$ .

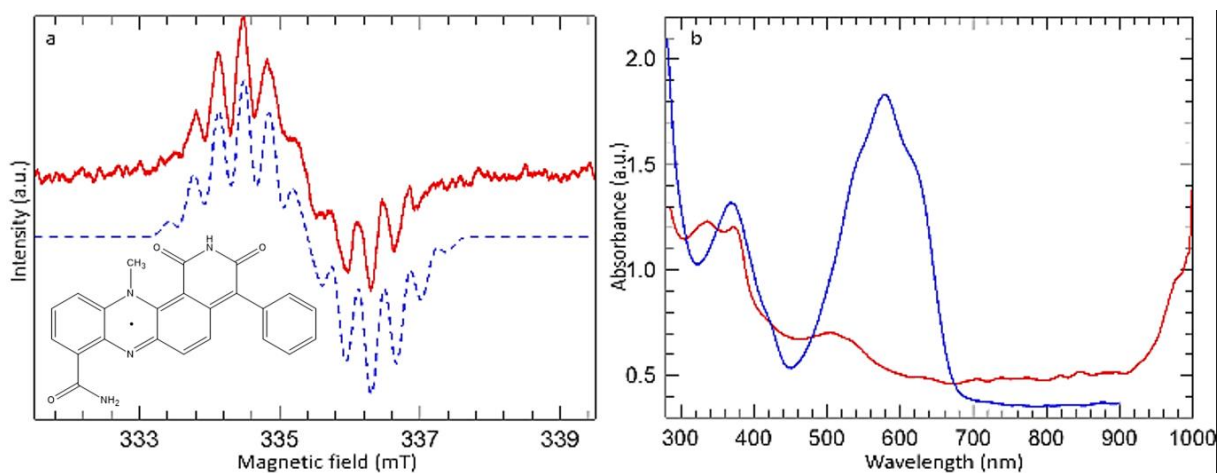

S16. Dermacozine E neutral semiquinone radical EPR (a) in chloroform (red line, experimental 550 $\pm$ 50 nm filter, blue dashed line modelled EPR spectrum) and (b) UV Vis Spectrum before (blue) and after (red) the the dermacozine O semiquinone radical formed in chloroform (inlet: confirmed dermacozine E radical structure).

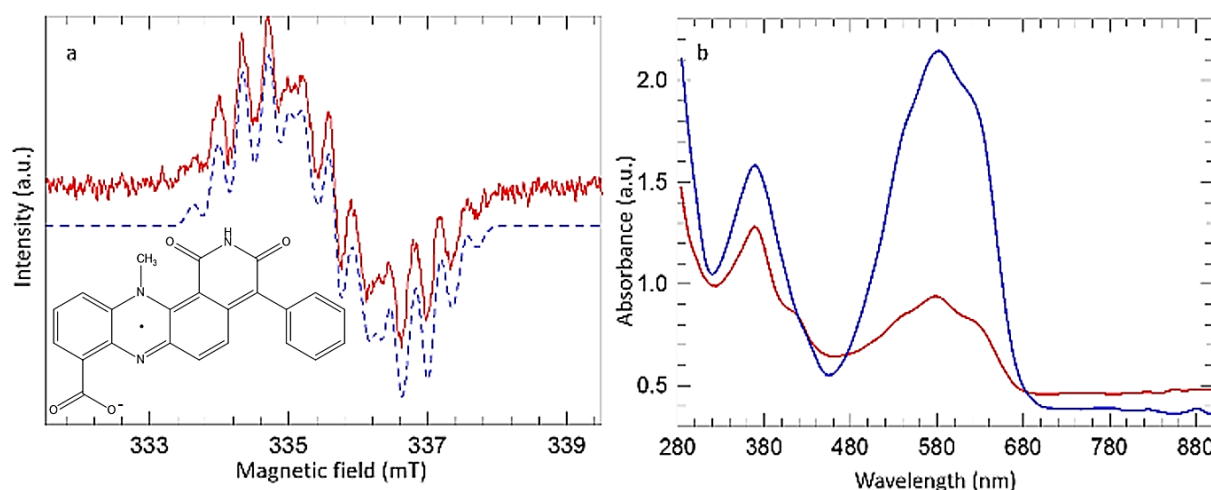

S17. Dermacozone O neutral semiquinone radical EPR (a) in chloroform (red line, experimental 550±50 nm filter, blue dashed line modelled EPR spectrum) and (b) UV Vis Spectrum before and after the the dermacozine O semiquinone radical formed in chloroform (inlet: confirmed dermacozine O radical structure).

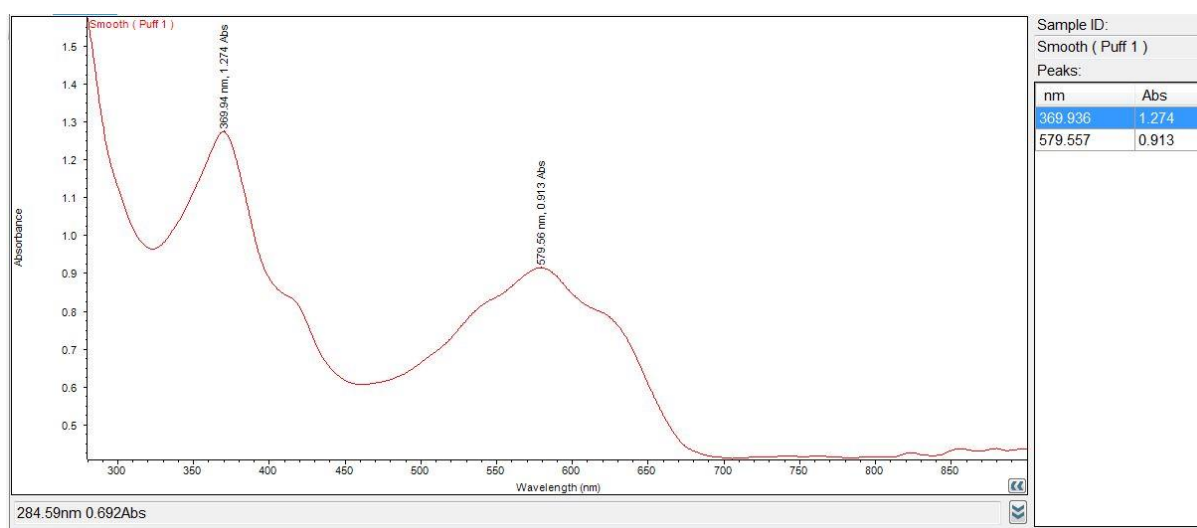

S18. Dermacozone O radical UV-Vis Spectrum in  $\text{CHCl}_3$ .

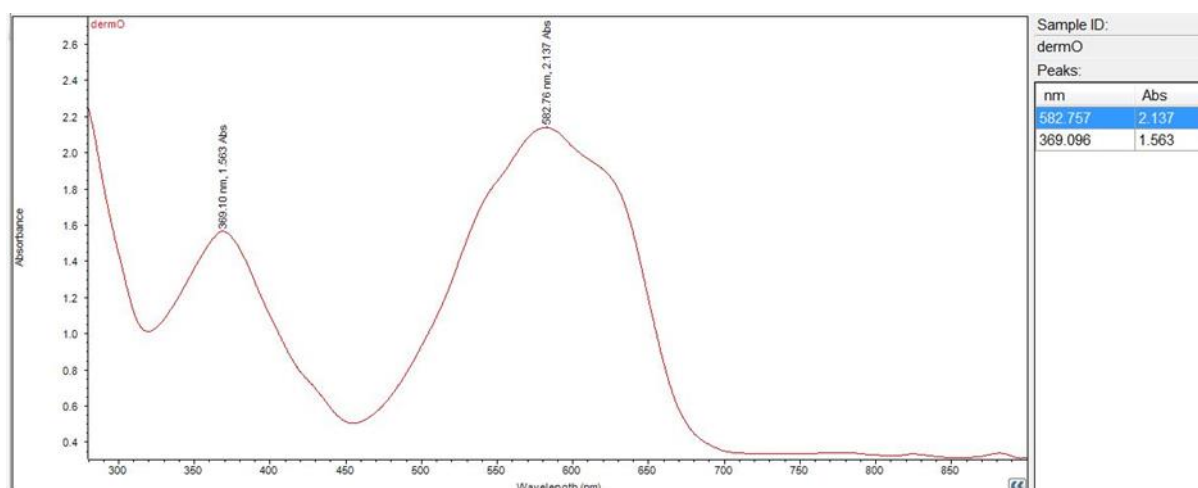S19. Dermacozine O UV-Vis Spectrum in  $\text{CHCl}_3$ .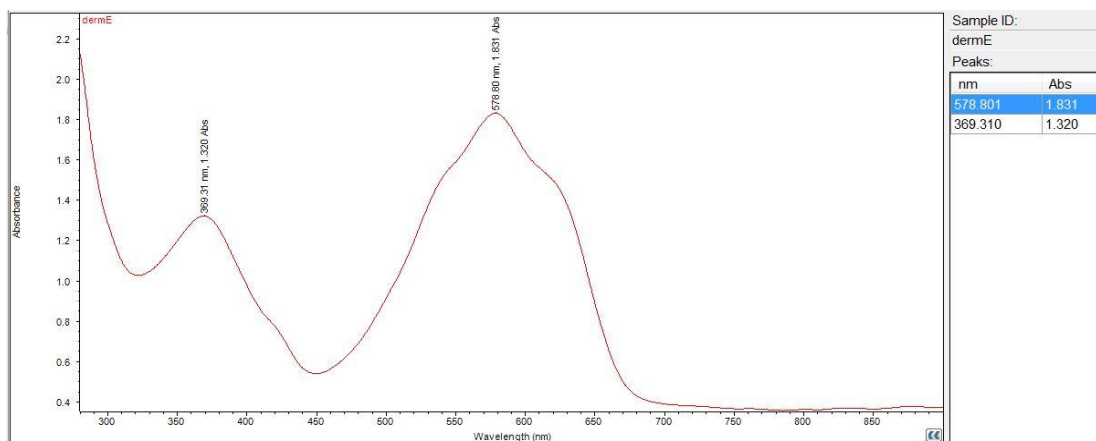S20. Dermacozine E UV-Vis Spectrum in  $\text{CHCl}_3$  (solution is blue).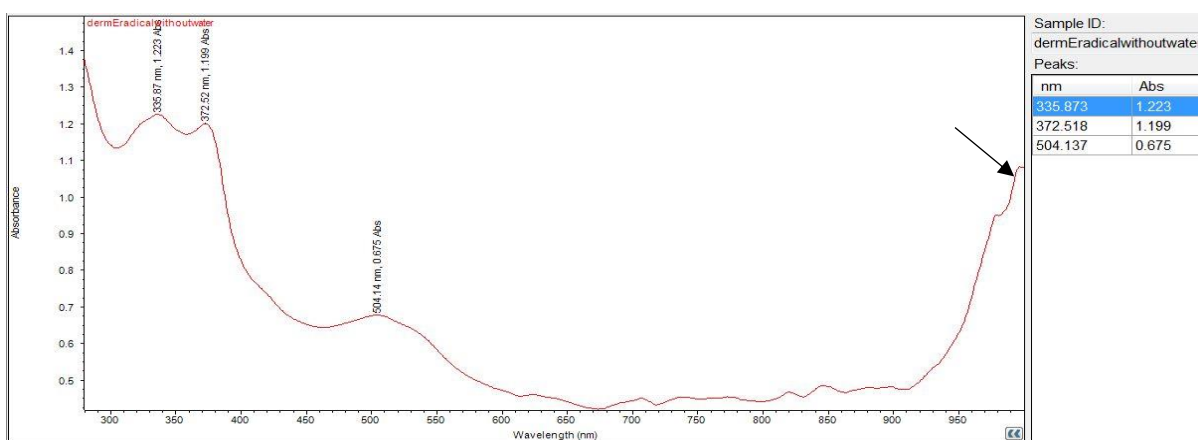S21. Dermacozine E UV-Vis Spectrum, after EPR and with 550 nm filter irradiation, in  $\text{CHCl}_3$  (solution is orange), a near infrared band (arrow) appeared at  $\sim 1000$  nm, 298 K.

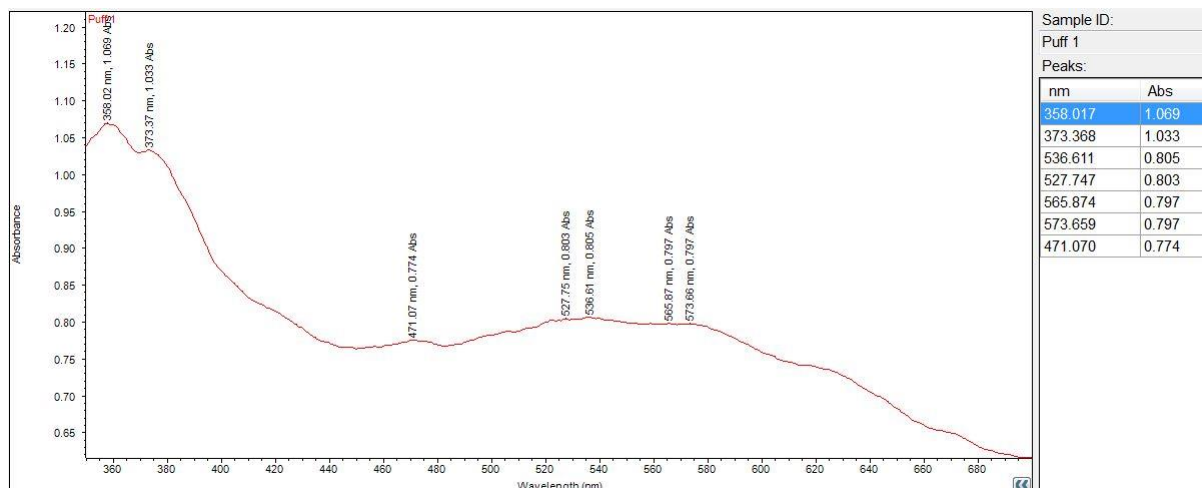

S22. Dermacozone E UV-Vis Spectrum, after EPR and with 550 nm filter irradiation, in CH<sub>3</sub>OH (colour of the solution changed to blue from orange), 298 K.

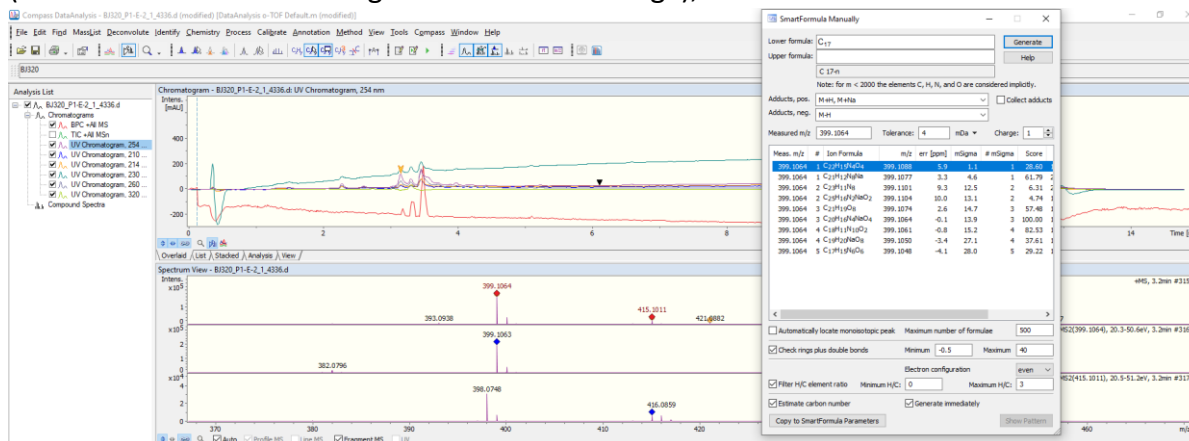

S23. Dermacozone E (LC)-HR-(ESI)-MS<sup>n</sup> after irradiation and EPR in CH<sub>3</sub>OH.

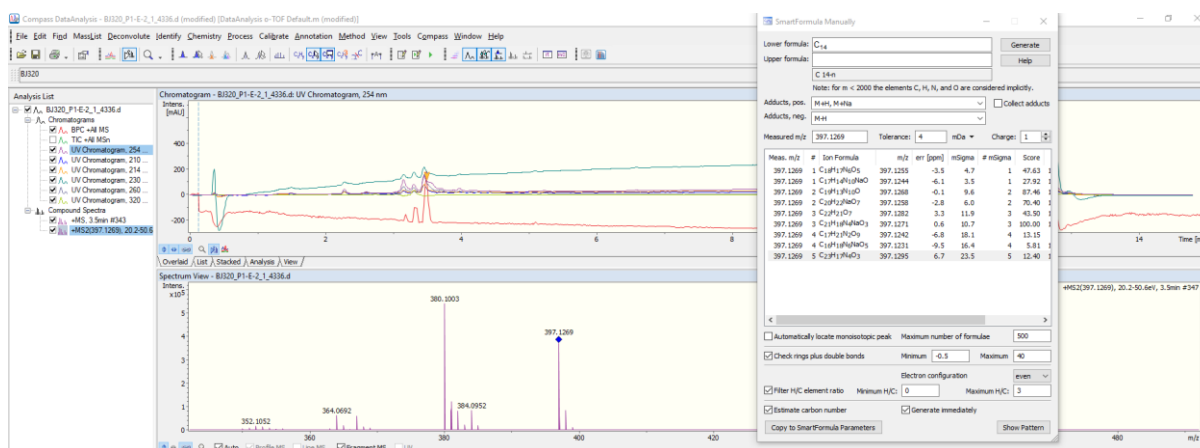

S24. Dermacozone E dimer (LC)-HR-(ESI)-MS<sup>n</sup> after irradiation dissociated in CH<sub>3</sub>OH and dermacozone E is detectable again.



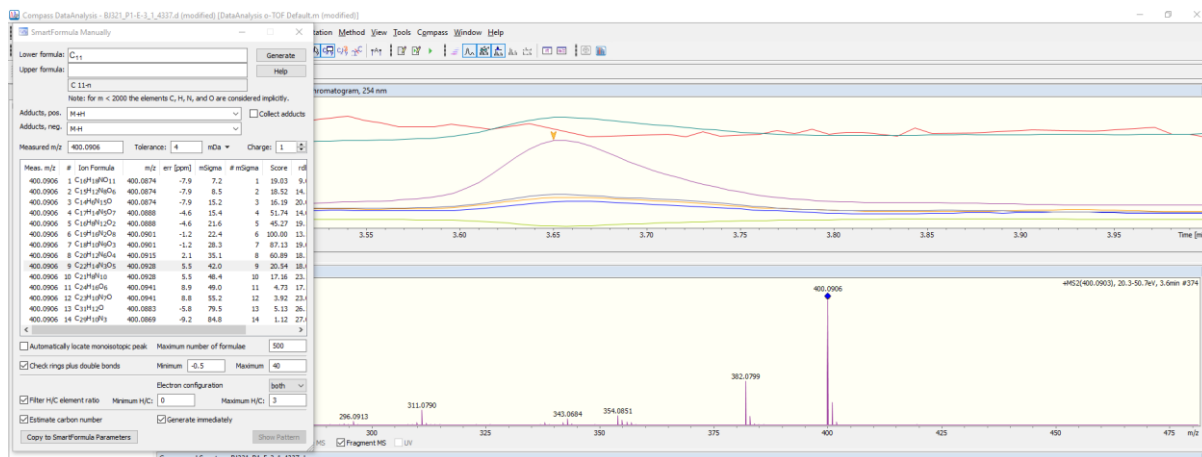

S25. Dermacozone O (LC)-HR-(ESI)-MS<sup>n</sup> after irradiation and EPR in CH<sub>3</sub>OH.

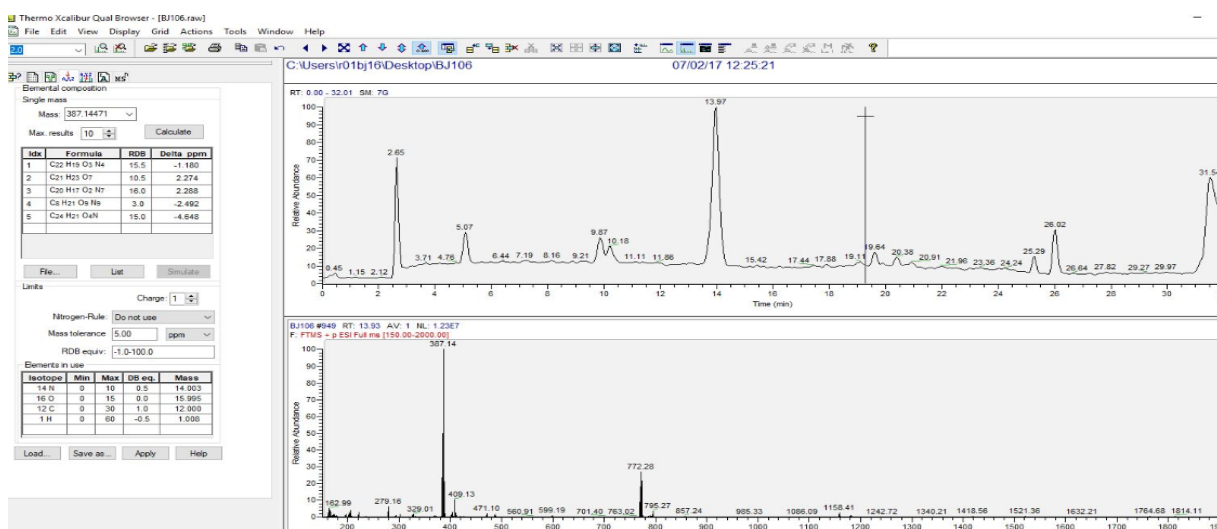

S26. LC MS Mass Spectrometry Chromatogram of Dermacozone B (Orbitrap)

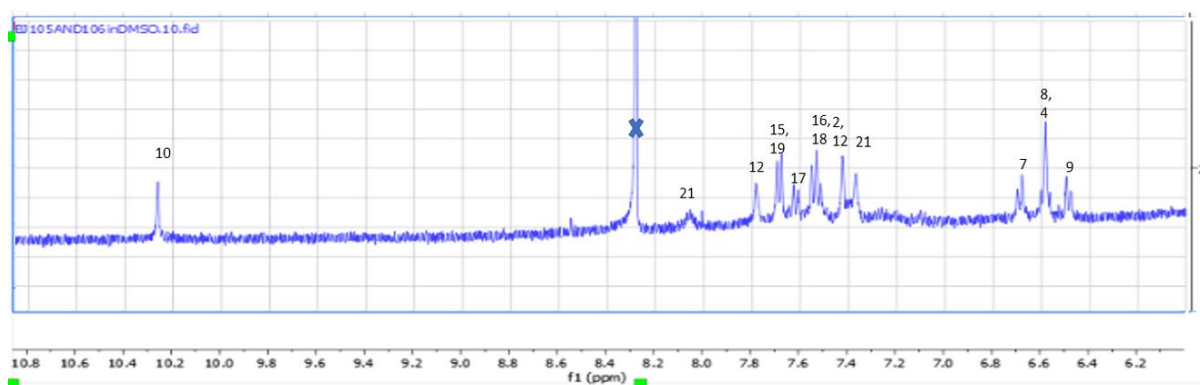

S27. Dermacozone B 1D <sup>1</sup>H NMR Spectrum in DMSO-*d*<sub>6</sub> 400 MHz (x: contaminant)

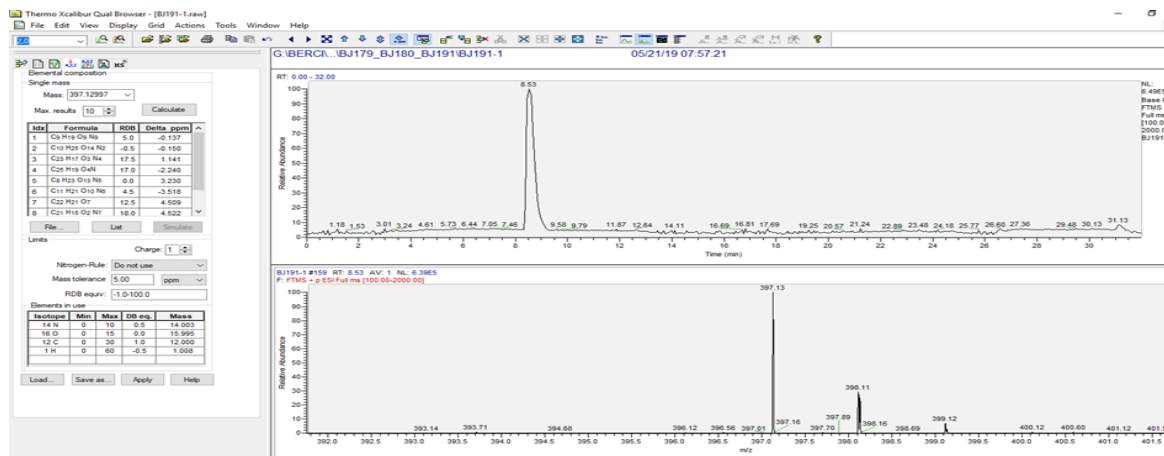

S28. LC MS Mass Spectrometry Chromatogram of Dermacozone E (Orbitrap)

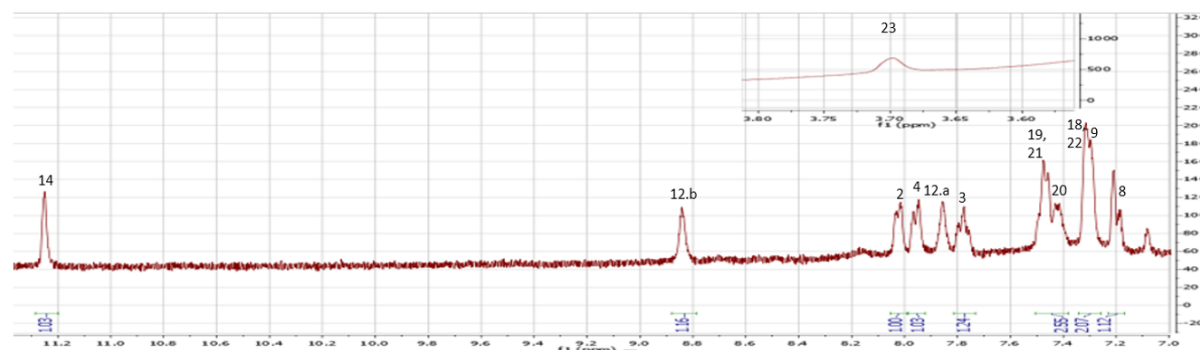

S29. Dermacozone E 1D <sup>1</sup>H NMR Spectrum in DMSO-*d*<sub>6</sub> 400 MHz

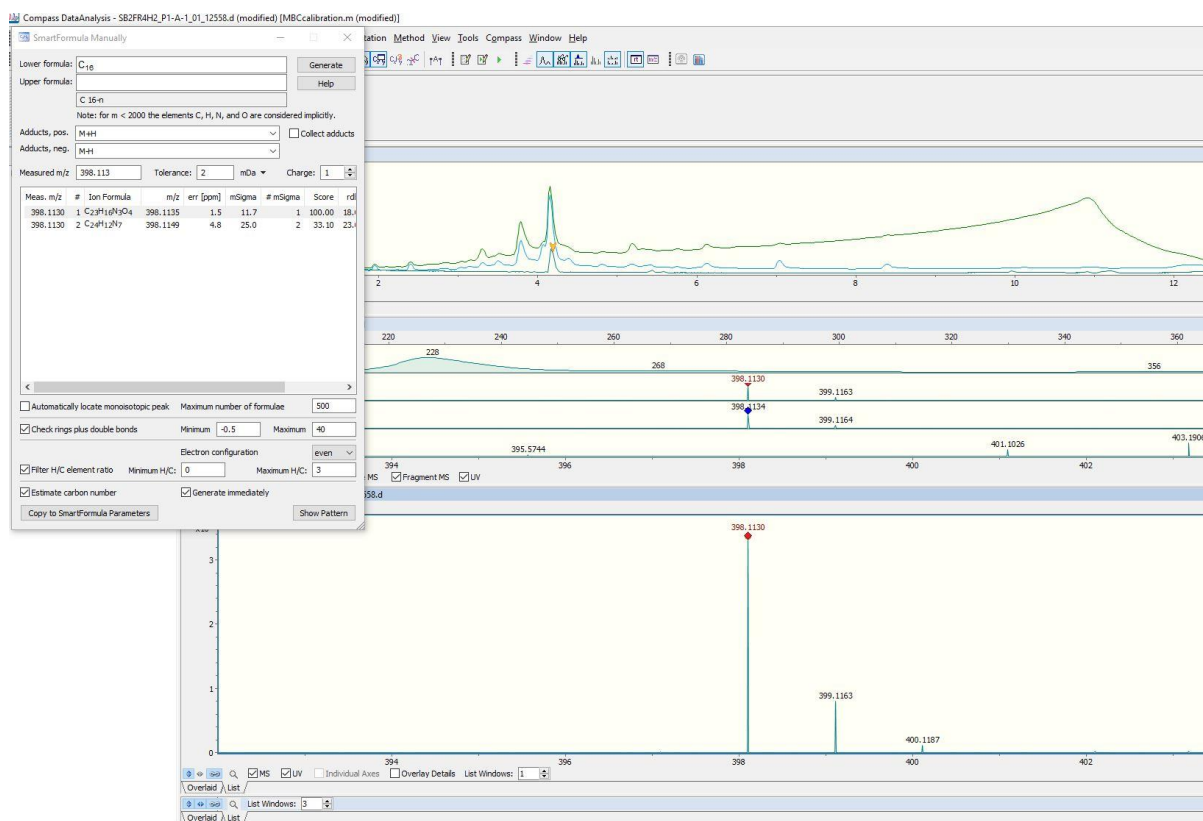

S30. LC MS Mass Spectrometry Chromatogram of Dermacozone F (qToF)

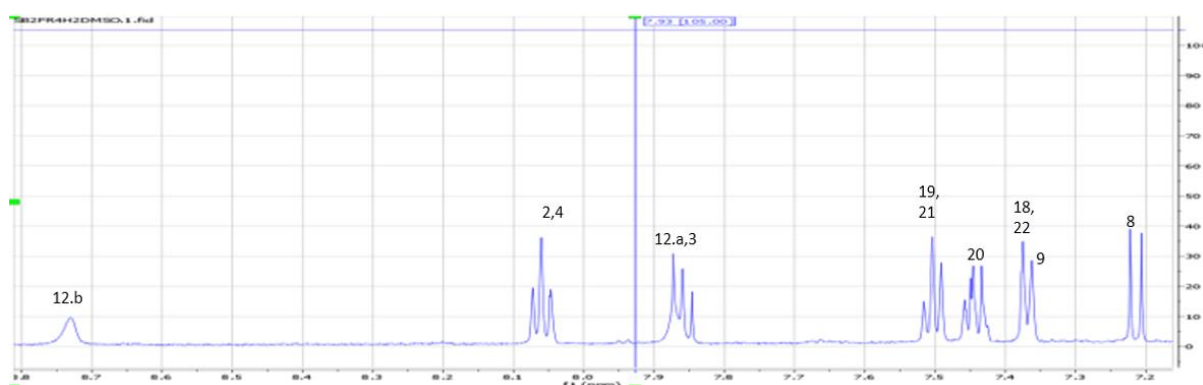S31. Dermacozone F 1D <sup>1</sup>H NMR Spectrum in DMSO-*d*<sub>6</sub> 400 MHz

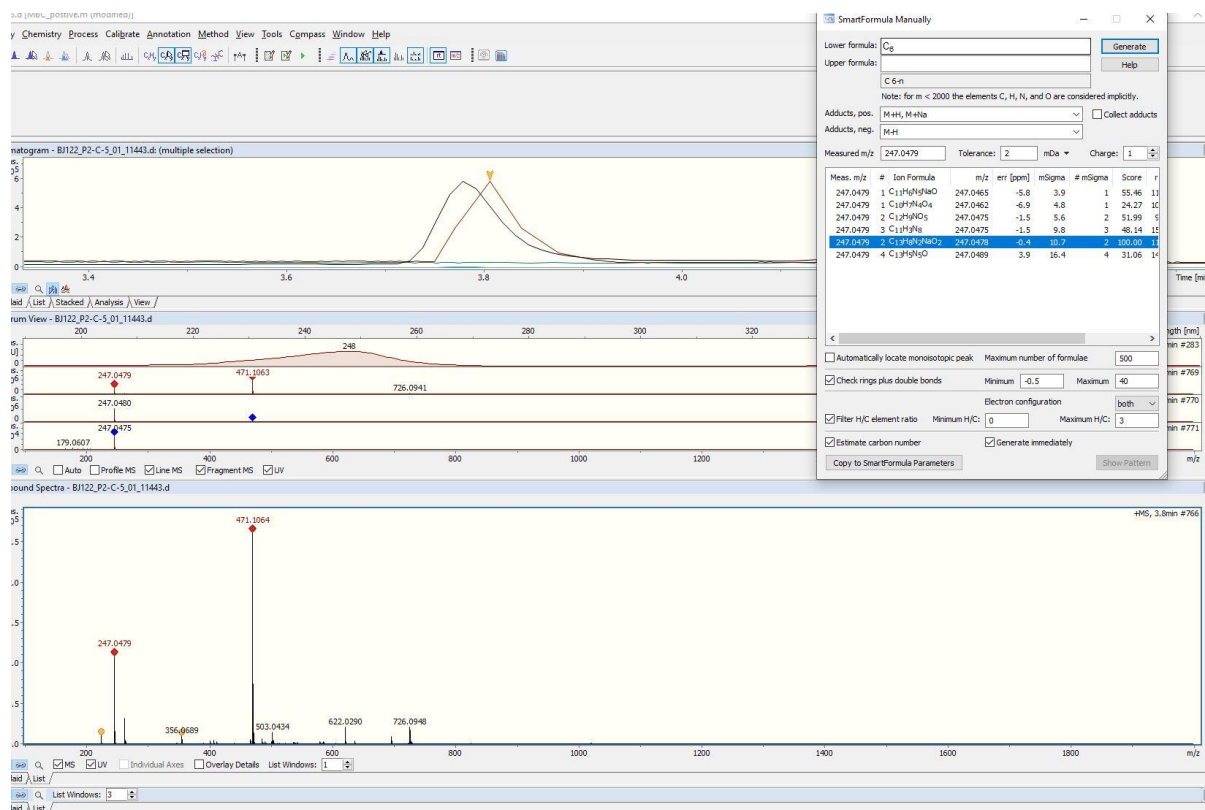

S32. LC MS Mass Spectrometry Chromatogram of PCA (qToF)

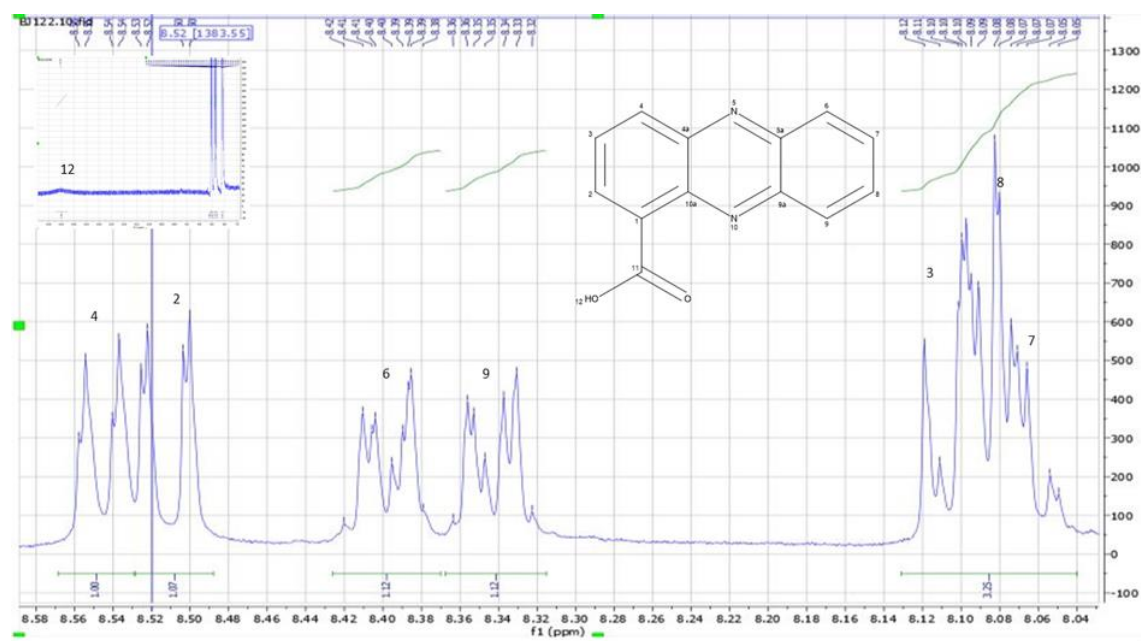S33. PCA 1D <sup>1</sup>H NMR Spectrum in DMSO-*d*<sub>6</sub> 400 MHz

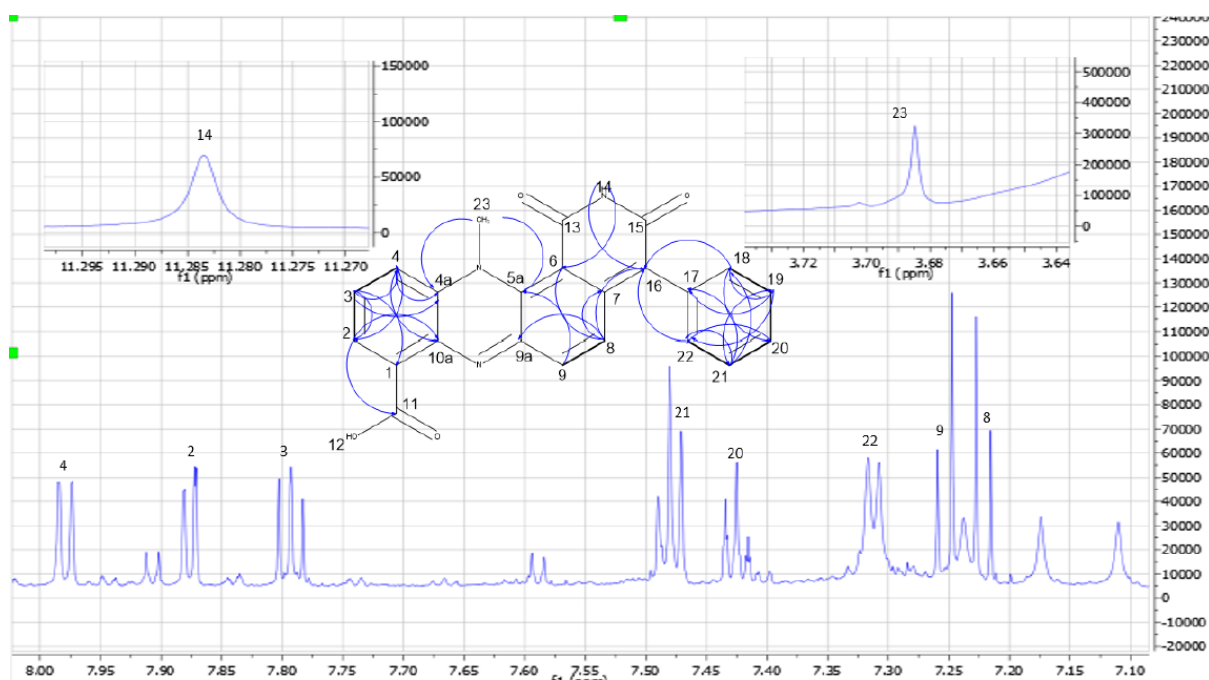

### S34. Dermacozone O 1D $^1\text{H}$ NMR Spectrum in $\text{DMSO-}d_6$ 400 MHz

(† N.B. Identical spectral data of dermacozine O and P appearing in SI which have already been published in Reference [5]. However, for clarity and for completeness the authors present them in the SI with appropriate citation).

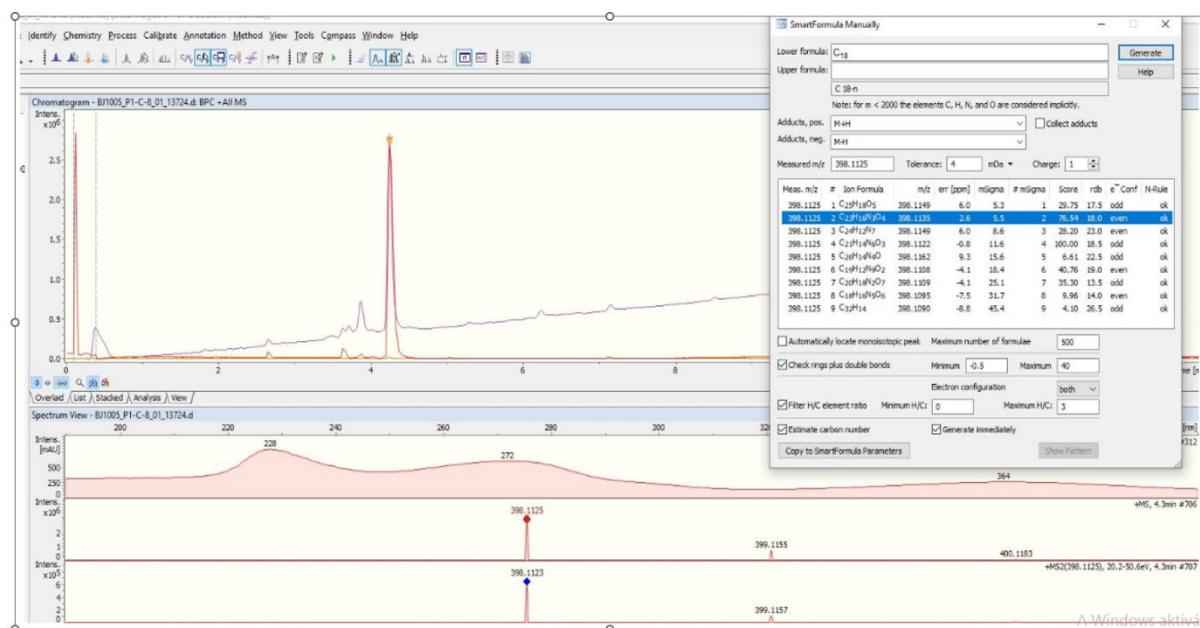

### S35. LC MS Mass Spectrometry Chromatogram of Dermacozone O (qToF)

(† N.B. Identical spectral data of dermacozine O and P appearing in SI which have already been published in Reference [5]. However, for clarity and for completeness the authors present them in the SI with appropriate citation).

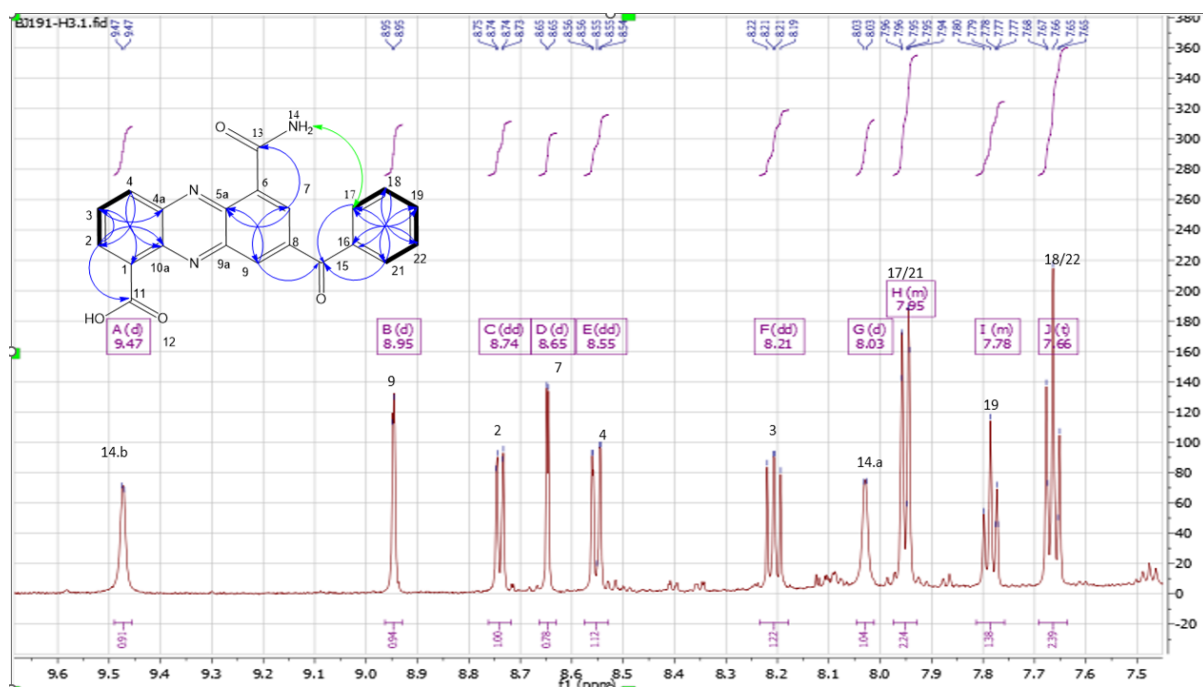

### S36. Dermacozone P 1D $^1\text{H}$ NMR Spectrum in $\text{DMSO}-d_6$ 400 MHz

(† N.B. Identical spectral data of dermacozone O and P appearing in SI which have already been published in Reference [5]. However, for clarity and for completeness the authors present them in the SI with appropriate citation).

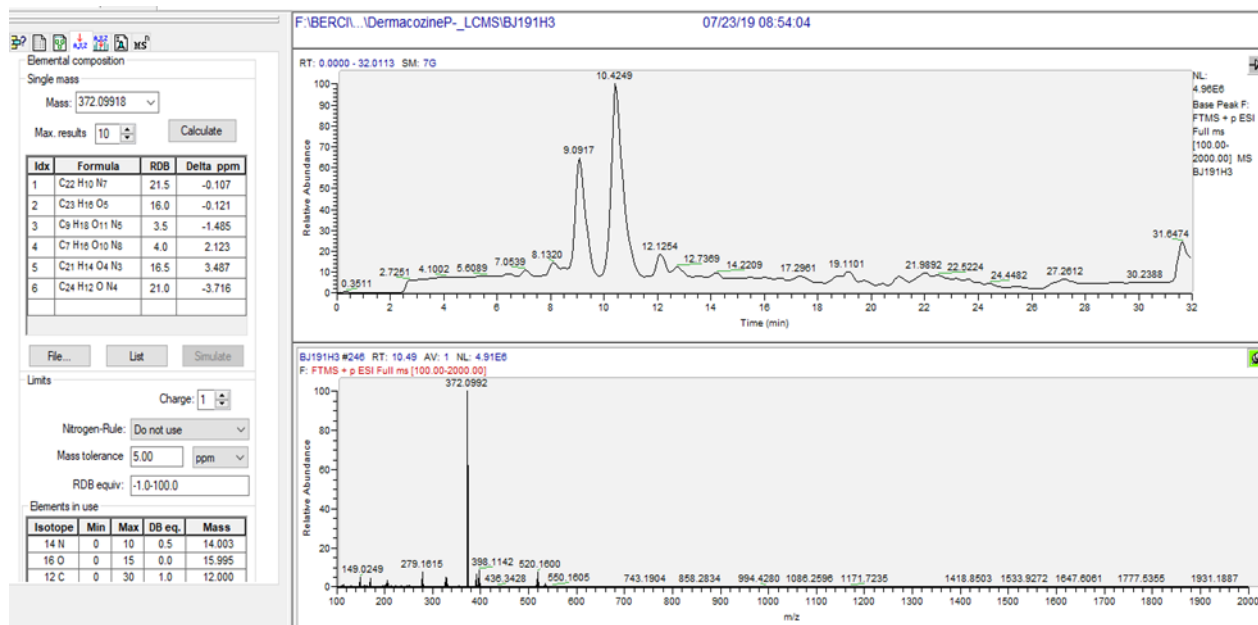

### S37. LC MS Mass Spectrometry Chromatogram of Dermacozone P (Orbitrap)

(† N.B. Identical spectral data of dermacozone O and P appearing in SI which have already been published in Reference [5]. However, for clarity and for completeness the authors present them in the SI with appropriate citation).
